# Supplementary figures and images for: Incidence and Characteristics of Intraocular Lens Dislocation after Phacoemulsification: An Eight-Year, Nationwide, Population-Based Study
Source: MDPI journal article supplement (doi:10.3390/jcm10173830), 2021-08-26

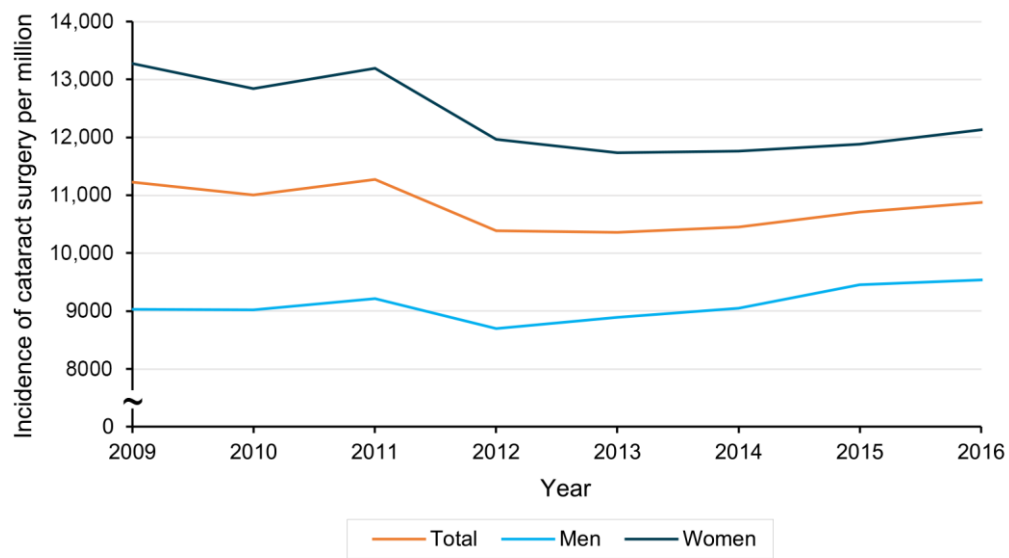

Figure S1: The incidence rate of cataract surgery between 2009 and 2016.

Supplement: s1 [file s1]
